# Supplementary material
Source: PubMed Central journal article supplement (PMC5574674)
Supplement: supp_WNL.0000000000004153_Table_e-1.pdf [file supp_WNL.0000000000004153_Table_e-1.pdf]

## Supplementary Results

Table e-1. Associations of covariates with gait slowing for adults aged 70-79 at baseline (n=193).

|                                    | Pearson correlation with gait slope for continuous variables | Difference in gait slope for categorical variables |         |
|------------------------------------|--------------------------------------------------------------|----------------------------------------------------|---------|
|                                    | r                                                            | Mean Difference s (SD)                             | p-value |
| <i>Demographics</i>                |                                                              |                                                    |         |
| Baseline Age                       | 0.23                                                         |                                                    | 0.001   |
| Female                             |                                                              | 0.025 (0.11)                                       | 0.1     |
| Black Race                         |                                                              | 0.002 (0.11)                                       | 0.9     |
| < High School Education            |                                                              | 0.016 (0.11)                                       | 0.3     |
| <i>Health Characteristics</i>      |                                                              |                                                    |         |
| Prevalent or incident CHD          |                                                              | 0.014 (0.11)                                       | 0.5     |
| Prevalent or incident diabetes     |                                                              | 0.013 (0.11)                                       | 0.5     |
| Prevalent or incident hypertension |                                                              | 0.039 (0.11)                                       | 0.07    |

|                                              |       |               |        |
|----------------------------------------------|-------|---------------|--------|
| Recurrent faller                             |       | 0.007 (0.11)  | 0.7    |
| Knee pain at time of MRI                     |       | 0.050 (0.10)  | 0.001  |
| Quadriceps strength at time of MRI (N*m)     | -0.15 |               | 0.04   |
| <i>Markers of Dementia Risk</i>              |       |               |        |
| Total GMV/ICV                                | -0.20 |               | 0.005  |
| Total WMH                                    | 0.19  |               | 0.01   |
| APOE e4 carrier                              |       | 0.039 (0.011) | 0.03   |
| <i>Gait Speed Measures</i>                   |       |               |        |
| Time to walk at baseline (sec)               | -0.02 |               | 0.8    |
| Time to walk at MRI (sec)                    | 0.33  |               | 0.0005 |
| Time to walk at cognitive adjudication (sec) | 0.32  |               | <0.001 |
| Last 4 years slope of walk time (sec/year)   | 0.32  |               | <0.001 |
